# Supplementary material for: Magnetic Hierarchically Mesoporous UIO-66(Ce/Ti) Core-Shell Nanocomposites for Efficient Enrichment of Phosphopeptides
Source: Research Square preprint supplement (doi:10.21203/rs.3.rs-6226795/v1), 2025-03-24
Supplement: Supplementary file 1 [file 717a9030ec362fd1c7e0a38f.docx]

**Supporting Information**

**Magnetic Hierarchically** **Mesoporous UIO-66(Ce/Ti) Core-Shell Nanocomposites for Efficient Enrichment of Phosphopeptides**

Jieling Zhang a, 1, Nan Li b, *, 1, Hui Lv a, Xinyu Fan a, Xiaoran Liu a, Fuquan Dang a, *

*a [[1]](#footnote-1)Key Laboratory of Analytical Chemistry for Life Science of Shaanxi Province, School of Chemistry and Chemical Engineering, Shaanxi Normal University, 620 West Chang′an Street, Xi′an 710119, China*

*b* *School of Chemistry and Environmental Engineering, Sichuan University of Science and Engineering, Zigong 643000, China*

**1. Materials and chemicals**

Cerium(IV) ammonium nitrate (NH4)2Ce(NO3)6 was procured from Macklin Biochemical Co., Ltd (Shanghai, China, http://www.macklin.cn/). Hydroxypropyl methylcellulose related products were provided from Shandong Head Group Co., Ltd (https://www.sdhead.com) and Luzhou North Chemical Industry Co., Ltd, China North Industries Group (lzbfhg.norincogroup.com.cn). Pluronic P123, lysozyme, *β*-Casein (from bovine milk), trypsin (TPCK treated), 2,5-dihydroxybenzoic acid (DHB), and HEPES were supplied by Sigma-Aldrich (St. Louis, MO, USA, https://www.sigmaaldrich.com). Sodium perchlorate monohydrate (NaClO4·H2O), bovine serum albumin (BSA), 1,4-benzenedicarboxylic acid (H2BDC), sodium acetate (NaAc), trifluoroacetic acid (TFA), and tetraethyl orthosilicate (TEOS) were attained from Aladdin Bio-Chem Technology Co., Ltd (Shanghai, China, http://www.aladdin-e.bioon.com.cn/). Acetic acid (HAc), ammonium hydroxide (NH3·H2O, 25 - 28 wt%), absolute ethanol, ammonium bicarbonate (NH4HCO3), urea, NaCl, KCl, and glucan were procured from Sinopharm Chemical Reagent Co., Ltd (Shanghai, China, https://www.sinoreagent.com/). Iron(III) chloride hexahydrate (FeCl3·6H2O), ethylene glycol (EG), acetonitrile (ACN), N,N-Dimethylformamide (DMF), and dibasic sodium phosphate (Na2HPO4·12H2O) were obtained from Tianjin Fuyu Chemical Co., Ltd (Tianjin, China, https://www.fuyugs.com/). Phosphoric acid (H3PO4) was obtained from Guangdong GuanghuaSci-Tech Co., Ltd (Guangdong, China, https://www.ghtech.com/). Iodoacetamide (IAA) and dithiothreitol (DTT) were purchased from Thermo Fisher Scientific (Shanghai, China, https://chemicals.thermofisher.cn/cn/zh/home.html). The deionized water (18.4 MΩ·cm-1) in the process of all experiments was purified from a Milli-Q system (Millipore, Milford, MA). All reagents were purchased in analytical reagent (AR) and used without further purification.

**2. Characterization**

High-resolution field emission transmission electron microscopy (FETEM) images were acquired using a Tecnai F20 (FEI, USA) electron microscope operating at an accelerating voltage of 200 kV. Additionally, double energy dispersive X-ray spectroscopy (EDS) for high-throughput elemental mapping and line scan analysis was performed with a JEM-2800 (JEOL, Japan) microscope. Field emission scanning electron microscopy (FESEM, Hitachi SU8220, Japan) was utilized to characterize morphology at an accelerating voltage of 3 kV, with the instruments also employed in high-resolution (HR) mode. The X-ray diffraction (XRD) patterns were verified using a Bruker D8 Advance X-ray diffractometer (Cu Kα radiation, λ = 1.5406 Å, operational settings of 40 kV/40 mA), featuring a 2.2 kW copper anode and an X’Celerator super detector, across a 2θ scan range from 5° to 70°. X-ray photoelectron spectroscopy (XPS) measurements were performed utilizing a Kratos Axis Ultra XP spectrometer (Kratos Analytical Ltd., Manchester, UK), equipped with a monochromatic Al Kα radiation source operated at 150 W (15 kV, 10 mA). Fourier transform infrared (FT-IR) spectroscopy was recorded with a spectrometer (Bruker, Billerica, MA) scanning from 400 - 4000 cm-1. Thermogravimetric (TGA) analysis (SETARAM, France) was conducted by heating sample from 25 to 800 °C in air at a heating rate of 10 °C·min-1. Energy dispersive X-ray (EDX) images were obtained by using environmental scanning electron microscopy (ESEM, FEI Quanta 200, USA). Nitrogen physisorption isotherms were obtained using a Micromeritics ASAP 2460 (USA) instrument at 77 K, following sample outgassing at 130 °C under vacuum conditions for 12 hours prior to analysis. The saturation magnetization curves were acquired utilizing vibrating sample magnetometry (VSM) facilitated by a physical property measurement system (Quantum Design, San Diego, USA) under ambient conditions.

**3. Experimental section**

**3.1. Preparation of Fe3O4 nanoparticles**

Fe3O4 nanoparticles (with an average size of 410 nm) were synthesized via a solvothermal method as outlined in previous literature [1, 2]. Specifically, FeCl3·6H2O (2.81 g) was dissolved in ethylene glycol (EG, 60 mL) using agitation to form a clear yellow solution. Subsequently, NaAc (6.21 g) and polyethylene glycol (PEG, Mw = 600) (1.2 g) were incrementally added and the mixture was stirred for an additional 40 minutes. The resulting homogenous solution was then transferred to a Teflon-lined stainless-steel autoclave and subjected to thermal treatment in a vacuum oven at 200 °C for 12 hours. Finally, Fe3O4 nanoparticles were separated magnetically, washed alternately with deionized water and absolute ethanol six times, and dried at 60 °C overnight for subsequent applications.

**3.2. Preparation of Fe3O4@SiO2 nanoparticles**

Fe3O4@SiO2 nanoparticles were synthesized via a sol-gel method [3]. An ethanol suspension of Fe3O4 nanoparticles (10.0 mL, 21 mg/mL) was introduced into a composite solution comprising ethanol (100.0 mL), deionized water (35.0 mL), and NH3·H2O (25 - 28%, 2.0 mL) under ultrasonication treatment. Twenty minutes later, 1.0 mL of TEOS was incrementally added to the mixture under continuous mechanical agitation (300 rpm) for 16 hours. Subsequently, the resultant products were isolated by magnetic separation and subjected to five alternate washes with deionized water and absolute ethanol. Finally, Fe3O4@SiO2 nanoparticles were dried for subsequent applications.

**3.3. Preparation of Lyz-coated Fe3O4@SiO2 nanoparticles**

Lyz-coated Fe3O4@SiO2 nanoparticles were fabricated through a single-step aqueous self-assembly process involving lysozyme (Lyz) [4]. The synthesized Fe3O4@SiO2 (20 mg) were uniformly dispersed in a 13 mL mixed solution comprising equal volumes of 11.25 mg Lyz in 10 mM HEPES buffer and 80.62 mg TCEP in 10 mM HEPES buffer, and incubated at 37 °C for 45 minutes. Subsequently, the products were collected via magnetic separation and subjected to six alternate washes with deionized water and absolute ethanol. Finally, the products were dried under vacuum to obtain the Lyz-coated Fe3O4@SiO2 nanoparticles.

**3.4. Sample pretreatment**

According to the previous method, *β*-Casein (5.0 mg) serving as the standard protein was incubated with 1.0 mL of ammonium bicarbonate (50 mM NH4HCO3, pH 8.3) containing 125 µg of trypsin at 37 °C for 18 hours.Subsequently, the tryptic peptides were subjected to dialysis using RC Dialysis Membranes (MWCO = 500 Da) for 24 hours, followed by lyophilization and storage at -20 °C. In the next step, BSA (5.0 mg) was dissolved in 1.0 mL of NH4HCO3 (50 mM, pH 8.3) with the inclusion of 8 M urea and incubated at 37 °C for 1 hour. The resulting solution was reduced with DTT (10 µL, 100 mM) at 60 °C for 1 hour and subsequently alkylated with IAA (40 µL, 100 mM) in the dark for 30 minutes. Following dilution with NH4HCO3 (9.0 mL, 25 mM), the mixture underwent digestion with 125 µg of trypsin at 37 °C for 18 hours. The reaction was terminated by the addition of formic acid (5.0 µL, 0.2%, v/v). Finally, the tryptic peptides were dialyzed, lyophilized, and stored at -20 °C.

Pretreatment of skim milk: Fresh skim milk (30 µL) as real biological sample was combined with 1.0 mL of NH4HCO3 solution (50 mM, pH 8.3) and subjected to centrifugation at 10,000 rpm for 20 minutes. Subsequently, the supernatant was heated at 100 °C for 15 minutes to induce protein denaturation and digested with 40 µg of trypsin at 37 °C for 18 hours. The resulting sample was ultimately stored at -20 °C until further analysis.

**4. MALDI-TOF MS analysis**

The mass spectrum (MS) data was acquired utilizing matrix-assisted laser desorption/ionization time-of-flight mass spectrometry (MALDI-TOF MS) (Bruker Daltonics, Bremen, Germany) operating in a positive-ion reflector mode. The instrumental parameters were set as follows: a smart beam laser wavelength of 337 nm, an acceleration voltage of 20 kV, a delayed extraction time of 180 ns, and an extraction percentage of 65%, respectively. Each MS peak was derived from an average of 100 laser pulses (frequency: 50 Hz; mass range: 1000 - 3500 Da). For the MS analysis, 1.5 μL of the eluate and matrix solution (255 mg·mL-1 in 50% ACN/1% H3PO4) were alternately deposited onto the MALDI-TOF MS target plate.

The acquired data were processed using Proteome Discoverer software (Thermo Fisher Scientific, version 1.4.0.288). The Human UniProtKB/Swiss-Prot database (Release 2015-03-11, containing 20199 sequences) was employed, and all MS data were interpreted via Mascot (Matrix Science, London, UK; version 2.3.2). Trypsin was designated as the specific protease; the mass tolerance was set at 10 ppm for precursor ions and 50 mmu for fragment mass tolerance, with oxidation (M) and phosphorylation (STY) considered as variable modifications.

**5. Supporting figures**

**5.1. Figure S1**


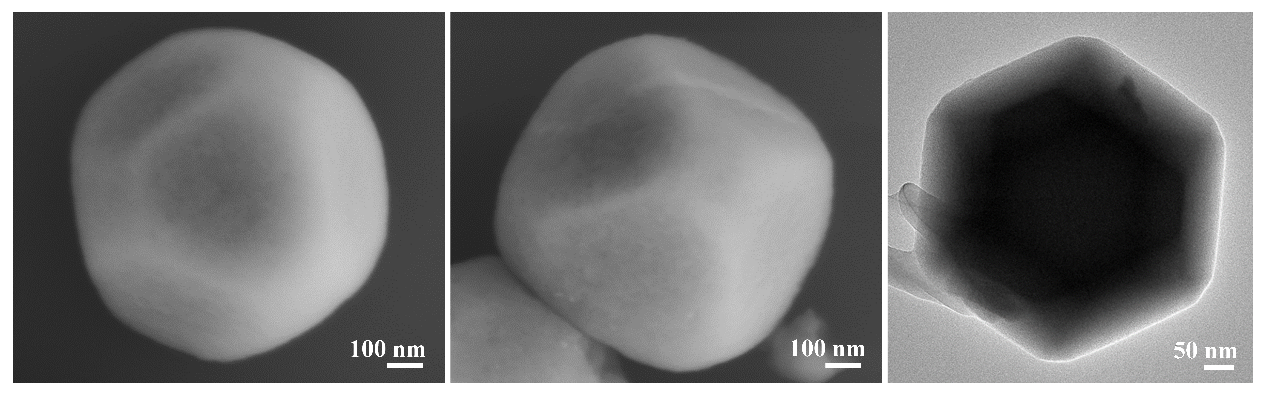


**a**

**b**

**c**

**Fig. S1.** SEM images (a and b) with different visual angles and TEM image (c) of micropore UIO-66(Ce) crystal.

**5.2. Figure S2**


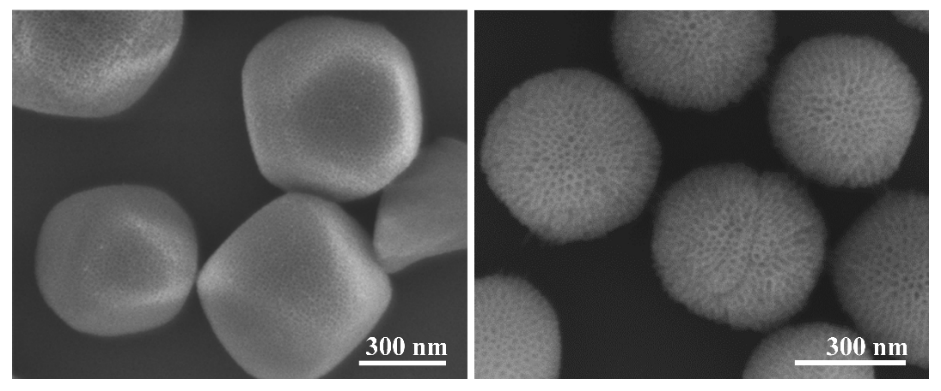


**a**

**b**

**Fig. S2.** Low-magnification SEM images of (a) HMUIO-66(Ce/Ti)-1 and (b) HMUIO-66(Ce/Ti)-2.

**5.3. Figure S3**


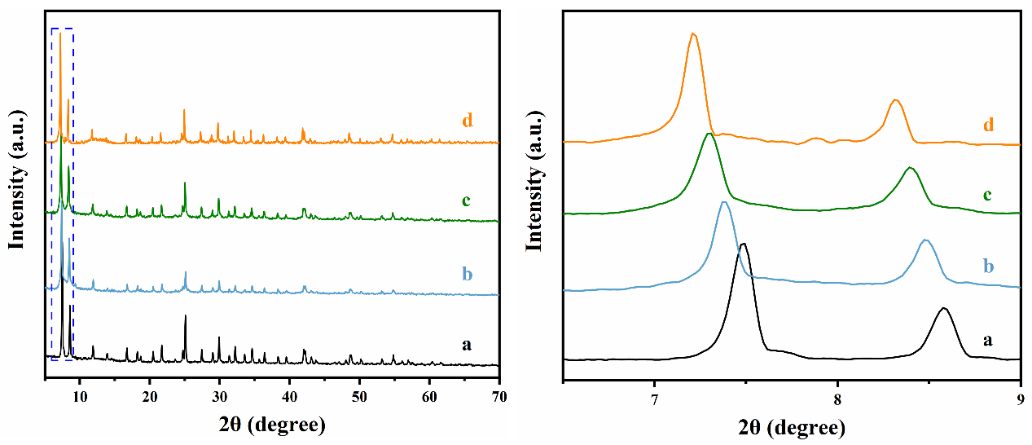


**Fig. S3.** XRD patterns (left) and magnified XRD spectra of the selected regions (right): (a) micropore UIO-66(Ce), (b) HMUIO-66(Ce/Ti)-1, (c) HMUIO-66(Ce/Ti)-2, and (d) HMUIO-66(Ce/Ti)-3, respectively.

**5.4. Figure S4**





**Fig. S4.** FT-IR spectra of (a) microporous UIO-66(Ce), (b) HMUIO-66(Ce/Ti)-1, (c) HMUIO-66(Ce/Ti)-2, and (d) HMUIO-66(Ce/Ti)-3, respectively.

In all MOFs of hierarchically mesoporous structure, C-H vibrations and C-O-C ether peaks at 2850 ~ 2930 cm-1 and 1109 cm-1 (shadows in the Fig.) had almost disappeared, indicating good removal of the polymer substant [5]. The peaks at 1560 and 1385 cm-1 (black dashed lines in Fig.) were attributed to antisymmetric and symmetric stretching vibrations of the carboxylic acid base group. The band at 517 cm-1 (red dashed line in Fig.) could be attributed to the stretching vibration of Ce-O [6].

**5.5. Figure S5**


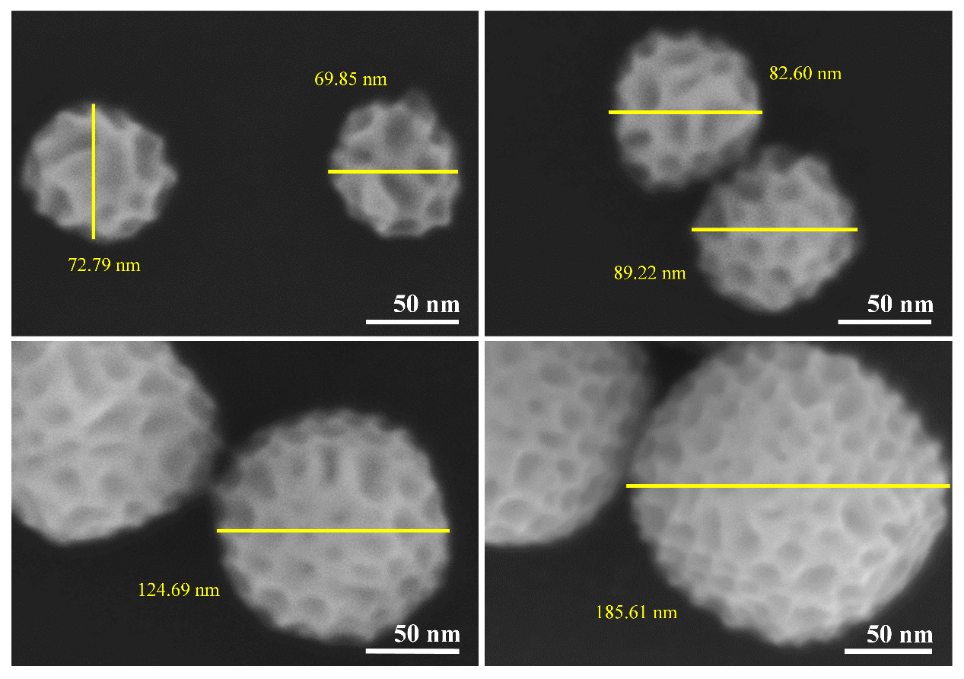


**b**

**d**

**c**

**a**

**Fig. S5.** Diameter sizes of HMUIO-66(Ce/Ti)-3 in SEM images at different synthesis times under other reaction condition being equal, (a) 2.5 min, (b) 4 min, (c) 8 min, and (d) 15 min, respectively.

**5.6. Figure S6**


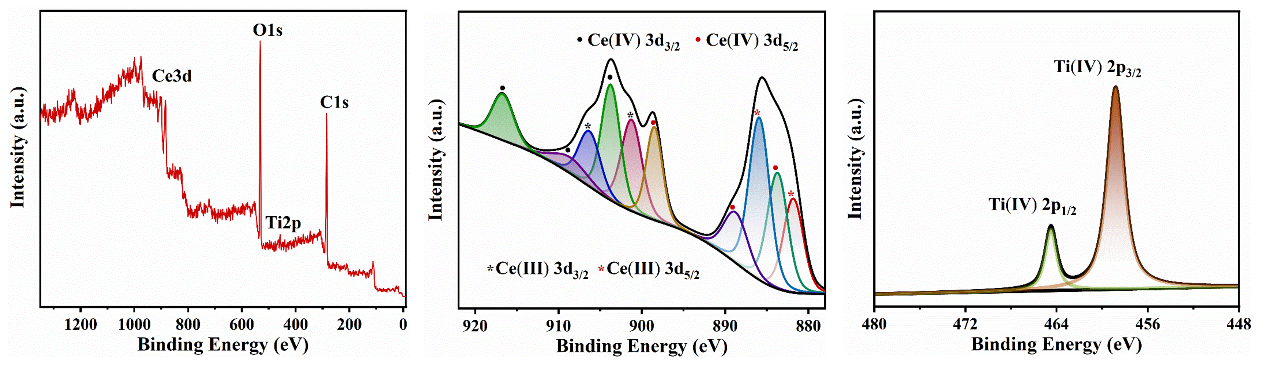


**c**

**b**

**a**

**Fig. S6.** XPS spectras of HMUIO-66(Ce/Ti)-3: (a) survey spectrum, (b) Ce3d, and (c) Ti2p spectra, respectively [7].

The Ce3d XPS spectra showed that HMUIO-66(Ce/Ti)-3 possessed abundant Ce(IV)/Ce(III) clusters (Fig. S5b). The peaks attributed to Ce(IV) were the core hole 3d3/2 signals at 916.8 eV, 908.9 eV, and 903.8 eV (black dots), and the spin-orbit splitting 3d5/2 signals at 898.5 eV, 888.9 eV, and 883.7 eV (red dots). On the other hand, the peaks ascribed to Ce(III) were the core hole 3d3/2 signals at 906.5 eV and 901.2 eV (black asterisks), and the spin-orbit splitting 3d5/2 signals at 885.9 eV and 881.8 eV (red asterisks). Meanwhile, XPS spectra of Ti2p revealed that the peaks assigned to Ti2p3/2 and Ti2p1/2 signals at 464.6 eV and 458.8 eV, respectively, indicating the successful doping of Ti(IV) in HMUIO-66(Ce/Ti)-3 crystal (Fig. S5c). Combining with the observations of the C1s and O1s peaks in XPS survey spectrum (Fig. S5a), the above results strongly indicated the presence of elements of C, O, Ce, and Ti in HMUIO-66(Ce/Ti)-3 architecture.

**5.7. Figure S7**





**Fig. S7.** TGA curves of HMUIO-66(Ce/Ti)-3 heated in air atmosphere.

In order to quantitatively calculate the number of connection defects in each cluster, we calculated the value of x in the chemical formula (Ce0.925Ti0.075)6O6(BDC)6-x based on the reported method [8, 9]. For convenience, the residue was assumed to be (Ce0.925Ti0.075)O2 (≈ 48.26%) and the final weight is normalized to 100%. The theoretical composition of defect-free UIO-66(Ce/Ti) was (Ce0.925Ti0.075)6O6(BDC)6 (≈ 94.37%) (theoretical TGA platform position, black dotted line), and the first step was attributed to the loss of residual ethanol and adsorbed H2O (25 ~ 100 °C). Weight loss in the 190 ~ 240 ℃ range was due to acetic acid removal and dehydration of Ce-oxo clusters. Dehydrated (Ce0.925Ti0.075)6O6(BDC)6 (≈ 84.05%) was in the experimental TGA platform position, while skeleton decomposition occurs at 334 °C. It was determined that each complete (Ce0.925Ti0.075)6 molecular unit x in HMUIO-66(Ce/Ti)-3 had about 1.68 bonding group defects.

**5.8. Figure S8**


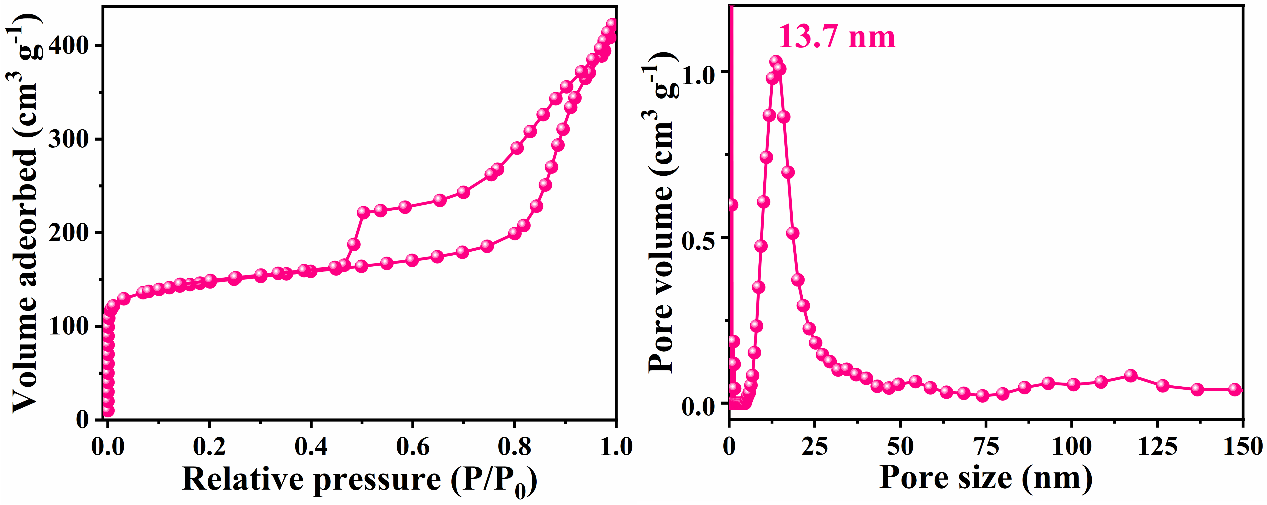


**b**

**a**

**Fig. S8.** Nitrogen physisorption adsorption desorption isotherm (a) and pore-size distribution curve (b) of MHMUIO-66(Ce/Ti) CSNCs.

**5.9. Figure S9**


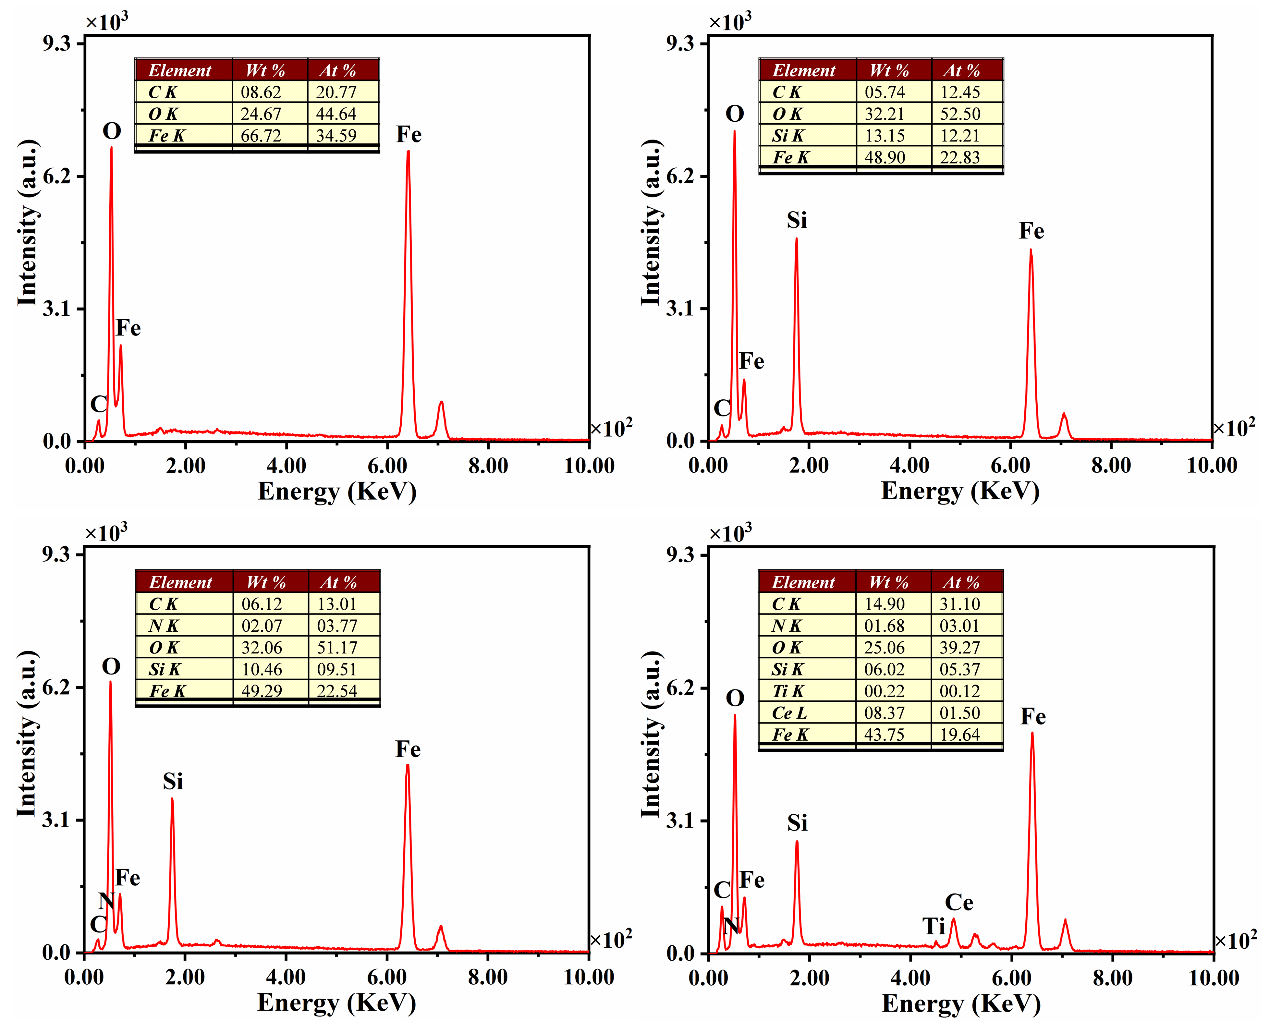


**d**

**c**

**b**

**a**

**Fig. S9.** EDX spectras of (a) Fe3O4, (b) Fe3O4@SiO2, (c) LYZ-coated Fe3O4@SiO2, and (d) MHMUIO-66(Ce/Ti) CSNCs, respectively.

**5.10. Figure S10**

**3700**

**Mass (m/z)**

**% Intensity (a.u.)**

**1000**

**1500**

**2000**

**2500**

**3000**

**3500**

**0**

**20**

**40**

**60**

**80**

**100**

**2762**

**Mass (m/z)**

**% Intensity (a.u.)**

**1000**

**1500**

**2000**

**2500**

**3000**

**3500**

**0**

**20**

**40**

**60**

**80**

**100**

**a**

**b**

*****

*****

*****

*****

*****

*****

*****

*****

*****

*****

*****

*****

*****

*****

*****

*****

*****

*****

*****

*****

*****

*****

*****

**Fig. 10.** MALDI-TOF MS spectra of the *β*-casein tryptic digests enriched by MHMUIO-66(Ce/Ti) CSNCs in loading buffer with two percentages of TFA: (a) 50.0% ACN/0.2% TFA and (b) 50.0% ACN/10.0% TFA. Phosphopeptides were marked with a blue star.

**5.11. Figure S11**

**8927**

**Mass (m/z)**

**% Intensity (a.u.)**

**1000**

**1500**

**2000**

**2500**

**3000**

**3500**

**0**

**20**

**40**

**60**

**80**

**100**

**6366**

**Mass (m/z)**

**% Intensity (a.u.)**

**1000**

**1500**

**2000**

**2500**

**3000**

**3500**

**0**

**20**

**40**

**60**

**80**

**100**

**a**

**b**

**2766**

**Mass (m/z)**

**% Intensity (a.u.)**

**1000**

**1500**

**2000**

**2500**

**3000**

**3500**

**0**

**20**

**40**

**60**

**80**

**100**

**1279**

**Mass (m/z)**

**% Intensity (a.u.)**

**1000**

**1500**

**2000**

**2500**

**3000**

**3500**

**0**

**20**

**40**

**60**

**80**

**100**

**c**

**d**

*****

*****

*****

*****

*****

*****

*****

*****

*****

*****

*****

*****

*****

*****

*****

*****

*****

*****

*****

*****

*****

*****

*****

*****

*****

*****

*****

*****

*****

*****

*****

*****

*****

*****

*****

*****

*****

*****

*****

**Fig. 11.** MALDI-TOF MS spectrometry profile of direct investigation 100 fmol *β*-casein tryptic digests (a), and investigation of different concentrations of tryptic digests from *β*-casein with MHMUIO-66(Ce/Ti) CSNCs in loading buffer (50.0% ACN/1.5% TFA): 100 fmol (b), 10 fmol (c), and 0.5 fmol (d), respectively. Phosphopeptides were marked with a blue star.

**6. Supporting tables**

**Table S1** The structural parameters of HMUIO-66(Ce/Ti) samples synthesized with the different molecular surfactant.

| **Samples** | ***D*BJH**  **(nm)** | ***S*BET**  **(****m2·g-1)** | ***S*BET-meso**  **(m2·g-1)** | ***V*pore**  **(cm3·g-1)** | ***V*mesopore**  **(cm3·g-1)** |
| --- | --- | --- | --- | --- | --- |
| **HMUIO-66(Ce/Ti)-1** | 8.6 | 598.9 | 85.4 | 0.23 | 0.07 |
| **HMUIO-66(Ce/Ti)-2** | 12.6 | 529.0 | 174.5 | 0.50 | 0.36 |
| **HMUIO-66(Ce/Ti)-3** | 14.8 | 483.9 | 213.4 | 0.60 | 0.41 |

**Table S2** The growth rates of central pore size and pore size distribution and of HMUIO-66(Ce/Ti) samples synthesized with the different polymer surfactant.

| **Samples** | ***#ΔP*meso (%)** | ***#ΔR*meso (%)** |
| --- | --- | --- |
| **HMUIO-66(Ce/Ti)-1** to **HMUIO-66(Ce/Ti)-2** | 46.5 | 98.5 |
| **HMUIO-66(Ce/Ti)-1** to **HMUIO-66(Ce/Ti)-3** | 72.1 | 183.1 |

*#ΔP*meso denoted as: the growth rates of central pore size.

*#ΔR*meso denoted as: the growth rates of pore size distribution when the pore volume value in the pore size distribution of curves was 0.20 cm3·g-1 and higher. Among them, the pore size distribution of 6.8 ~ 13.8 nm in HMUIO-66(Ce/Ti)-1, the pore size distribution of 8.5 ~ 21.4 nm in HMUIO-66(Ce/Ti)-2, and the pore size distribution of 8.4 nm ~ 26.8 nm in HMUIO-66(Ce/Ti)-3, respectively.

**Table S3** Detailed information of phosphopeptides enriched by MHMUIO-66(Ce/Ti) CSNCs from tryptic digest of *β*-casein.

| **Peak** | **Observed**  **(m/z)** | **Number of phosphorylation** | **Peptide sequence** |
| --- | --- | --- | --- |
| 1 | 1104.55 | 1 | KFQsEEQQQT |
| 2 | 1278.82 | 1 | FQsEEQQQTEDELQDKIHPF |
| 3 | 1482.99 | 1 | TVD[Mo]E[pS]TEVFTK |
| 4 | 1590.28 | 1 | sWMHQPHQPLPPTVMF |
| 5 | 1660.98 | 1 | K.VPQLEIVPN[pS]AEER.L |
| 6 | 1863.60 | 1 | DIGSE[Ps]TEDQA[Mo]EDIK |
| 7 | 1982.05 | 1 | NMAINP[pS]KENLCSTFCK |
| 8 | 2062.08 | 1 | FQ[pS]EEQQQTEDELQDK |
| 9 | 2106.39 | 1 | FLLQEPVLGPVRGPFPIIV |
| 10 | 2350.96 | 4 | NVPGEIVESL[pS][pS][pS]EES]ITR |
| 11 | 2488.62 | 2 | AMKPWIQPKTKVIP[pS]VR[pS]L |
| 12 | 2555.61 | 1 | FQ[pS]EEQQQTEDELQDKIHPF |
| 13 | 2640.03 | 4 | QMEAESI[pS][pS][pS]EEIVPN[pS]VEQK |
| 14 | 2719.66 | 5 | QMEAE[pS]I[pS][pS][pS]EEIVPN[pS]VEAQK |
| 15 | 2964.37 | 4 | ELEELNVPGEIVEpSLpSpSpSEESITR |
| 16 | 3041.65 | 3 | RELEELNVPGEIVESL[pS][pS][pS]EESITR |
| 17 | 3121.13 | 4 | RELEELNVPGEIVE[pS][pS][pS]EESITR |

[pS] represents for phosphorylated site.

**Table S4** Detailed information of phosphopeptides enriched by MHMUIO-66(Ce/Ti) CSNCs from tryptic digest of skim milk.

| **Peak** | **Observed**  **(m/z)** | **Number of phosphorylation** | **Peptide sequence** |
| --- | --- | --- | --- |
| 1 | 1099.10 | 1 | LEEEKNR |
| 2 | 1237.48 | 1 | TVDME[pS]TEVF |
| 3 | 1252.32 | 1 | TVD[Mo]E[pS]TEVF |
| 4 | 1482.03 | 1 | TVD[Mo]E[pS]TEVFTKb |
| 5 | 1561.07 | 4 | RELEELNVPGEIVE[pS]L[pS][pS][pS]EESITR |
| 6 | 1661.20 | 1 | VPQLEIVPN[pS]AEER |
| 7 | 1832.87 | 1 | YLGEYLIVPN[pS]AEER |
| 8 | 1863.82 | 1 | DIGSE[pS]TEDQA[Mo]EDIK |
| 9 | 1928.17 | 2 | DIG[pS]E[pS]TEDQAMEDIK |
| 10 | 1980.14 | 1 | NMAINP[pS]KENLCSTFCK |
| 11 | 2061.68 | 1 | FQ[pS]EEQQQTEDELQDK |
| 12 | 2081.45 | 1 | FQ[pS]EEQQQTEDELQDK-Na |
| 13 | 2254.61 | 1 | VPQLEIVPN[pS]AEERLHSMK |
| 14 | 2353.30 | 4 | NVPGEIVESL[pS][pS][pS]EE[pS]ITR |
| 15 | 2554.98 | 1 | FQ[pS]EEQQQTEDELQDKIHPF |
| 16 | 2640.03 | 4 | QMEAESI[pS][pS][pS]EEIVPN[pS]VEQK |
| 17 | 2694.81 | 3 | VNEL[pS]KDIG[pS]E[pS]TEDQA[Mo]EDIK |
| 18 | 2720.50 | 5 | QMEAE[pS]I[pS][pS][pS]EEIVPN[pS]VEAQK |
| 19 | 2762.47 | 4 | NT[Mo]EHV[pS][pS][pS]EE[pS]IISQETYKQ |
| 20 | 2949.09 | 3 | EKVNEL[pS]KDIG[pS]E[pS]TEDQA[Mo]EDIK |
| 21 | 2964.17 | 4 | ELEELNVPGEIVE[pS]L[pS][pS][pS]EESITR |
| 22 | 3025.97 | 2 | FPQ[pY]LQ[pY]LYQGPIVLNPWDQVKR |
| 23 | 3042.73 | 3 | RELEELNVPGEIVESL[pS][pS][pS]EESITR |
| 24 | 3122.83 | 4 | RELEELNVPGEIVE[pS]L[pS][pS][pS]EESITR |

[pS] represents for phosphorylated sites.

**Table S5** Comparison of the enrichment efficiency of MHMUIO-66(Ce/Ti) CSNCs for phosphopeptides with those of reported mesoporous nanomaterials.

| **Materials** | **Selectivity** | **LOD** | **Real samples** | **Number of identified**  **phosphopeptides** | **Ref.** |
| --- | --- | --- | --- | --- | --- |
| mMOF-FBP-Ti4+ | 1:500 | 0.2 fmol | skim milk | 14 | [10] |
| Zr-BTB@TiO2@Fe3O4  nanosheets | 1:1000 | 4 fmol | skim milk | 29 | [11] |
| MNPs@UIO-66-Arg CSSNCs | 1:2000 | 0.1 fmol | skim milk | 19 | [4] |
| Oxid-Ti3C2Tx/UIO-66-NH2 | 1:100 | 0.1 fmol | skim milk | 24 | [12] |
| mesoporous zirconium titanium  oxides | 1:1:100 | 5 fmol | skim milk | 13 | [13] |
| Imi-Pops-Zr | 1:1000 | 0.5 fmol | skim milk | 12 | [14] |
| mGO/CS beads | 1:200 | 0.5 fmol | skim milk | 10 | [15] |
| Fe3O4@nSiO2@mSiO2@TiO2 | 1:2000 | 0.5 fmol | skim milk | 13 | [16] |
| Fe3O4@TAPTDHTA-Ti4+ composites | 1:5000 | 0.05 fmol | skim milk | 9 | [17] |
| THZr-MOFs | 1:5000 | 0.05 fmol | skim milk | 16 | [18] |
| NPC/Co@PA-Ti4+ | 1:20000 | 0.5 fmol | skim milk | 19 | [19] |
| SPIO@COF-Guanidyl | 1:1000 | 0.05 fmol | skim milk | 17 | [20] |
| the zirconia/OMC composites | — | — | non-fat milk | 15 | [21] |
| Mesoporous SnO2 nanospheres | — | — | nonfat milk | 17 | [22] |
| zirconium oxide (ZrO2) aerogel | 1:100 | 4 pmol | nonfat milk | 17 | [23] |
| MHMUIO-66(Ce/Ti) CSNCs | 1:1000 | 0.5 fmol | nonfat milk | 24 | This work |

**References**

[1] Y. Li, Z. Wang, Z. Ali, K. Tian, J. Xu, W. Li, et al., Monodisperse Fe3O4 spheres: Large-scale controlled synthesis in the absence of surfactants and chemical kinetic process, Sci. China Mater. 62 (2019) 1488-1495.

[2] J. Liu, Z. Sun, Y. Deng, Y. Zou, C. Li, X. Guo, et al., Highly Water-Dispersible Biocompatible Magnetite Particles with Low Cytotoxicity Stabilized by Citrate Groups, Angew. Chem. Int. Ed. 48 (2009) 5875-5879.

[3] H. Peng, D. Wang, D. Ma, Y. Zhou, J. Zhang, Y. Kang, et al., Multifunctional Yolk-Shell Structured Magnetic Mesoporous Polydopamine/Carbon Microspheres for Photothermal Therapy and Heterogenous Catalysis, ACS Appl. Mater. Interfaces. 14 (2022) 23888-23895.

[4] Y. Zhang, N. Li, J. Li, M. Fan, Q. Zhang, F. Dang, Bifunctional MNPs@UIO-66-Arg core-shell-satellite nanocomposites for enrichment of phosphopeptides, Microchim. Acta 191:211 (2024).

[5] L. Peng, H. Peng, Y. Liu, X. Wang, C.-T. Hung, Z. Zhao, et al., Spiral self-assembly of lamellar micelles into multi-shelled hollow nanospheres with unique chiral architecture, Sci. Adv. 7 (2021) eabi7403

[6] J. Chen, K. Li, J. Yang, F. Xia, X. Liu, J. Gu, Temperature-Controlled Synthesis of Trimodal Hierarchically Porous MOFs with Variable Core-Shell Configurations, Chem. Mater. 36 (2024) 3307-3315.

[7] L.-Z. Zhang, L. Chen, G.-Y. Yan, R.-W. Liang, H.-H. Ou, Post-modification engineering of cerium metal-organic frameworks for efficient visible light-driven water oxidation, Rare Met. (2024).

[8] G. C. Shearer, S. Chavan, S. Bordiga, S. Svelle, U. Olsbye, K. P. Lillerud, Defect Engineering: Tuning the Porosity and Composition of the Metal–Organic Framework UiO-66 via Modulated Synthesis, Chem. Mater. 28 (2016) 3749-3761.

[9] F. Xia, K. Li, J. Yang, J. Chen, X. Liu, M. Gong, et al., DNase-mimetics based on bimetallic hierarchically macroporous MOFs for the efficient inhibition of bacterial biofilm, Sci. China Mater. 67 (2023) 343-354.

[10] W. Gao, F. Zhang, S. Zhang, J.-y. Li, H.-z. Lian, Ti(IV) immobilized bisphosphate fructose-modified magnetic Zr metal organic framework (MOF) for specific enrichment of phosphopeptides, Sep. Purif. Technol. 305 (2023) 122426.

[11] S. Yan, B. Luo, L. Yu, F. Lan, Y. Wu, Fabrication of Zr-BTB@TiO2@Fe3O4 Nanosheets via Combining Dielectric Barrier Discharge and In Situ Growth Method for the Enrichment of Phosphopeptides, ACS Sustain. Chem. Eng. 10 (2022) 14220-14229.

[12] J. He, L. Yu, B. Luo, Y. Liu, F. Lan, Y. Wu, Dielectric barrier discharge induced Oxid-Ti3C2Tx/UIO-66-NH2 composites for efficient phosphopeptides enrichment, Materials & Design 233 (2023) 112193.

[13] S. Zhao, W. Hu, D. Zhang, X. Wang, G. Guo, Packed in-tube solid-phase microextraction with mesoporous zirconium titanium oxides for highly efficient phosphopeptide enrichment and analysis, Microchem. J. 195 (2023).

[14] J. Chen, B. Wang, Y. Luo, W. Wang, C.-F. Ding, Y. Yan, Facile preparation of porphyrin-based porous organic polymers for specific enrichment and isolation of phosphopeptides and phosphorylated exosomes, Talanta 264 (2023).

[15] W. Gao, F. Zhang, S. Zhang, J.-y. Li, H.-z. Lian, Hydrophilic Porous Magnetic Graphene Oxide/Chitosan Composites for the Selective Separation and Enrichment of N-Glyco- and Phosphopeptides, ACS Appl. Nano Mater. 6 (2023) 15563-15573.

[16] L. Gao, J. Tao, L. Qi, X. Jiang, H. Shi, Y. Liu, et al., Synthesis of a metal oxide affinity chromatography magnetic mesoporous nanomaterial and development of a one-step selective phosphopeptide enrichment strategy for analysis of phosphorylated proteins, Anal. Chim. Acta 1195 (2022).

[17] Y. He, S. Zhang, C. Zhong, Y. Yang, G. Li, Y. Ji, et al., Facile synthesis of Ti4+-immobilized magnetic covalent organic frameworks for enhanced phosphopeptide enrichment, Talanta 235 (2021).

[18] Y. He, Q. Zheng, Z. Lin, Ti4+-immobilized hierarchically porous zirconium-organic frameworks for highly efficient enrichment of phosphopeptides, Microchim. Acta 188 (2021).

[19] C. Pu, H. Zhao, Q. Gu, Y. Zheng, M. Lan, Targeted immobilization of titanium (IV) on magnetic mesoporous nanomaterials derived from metal-organic frameworks for high-efficiency phosphopeptide enrichment in biological samples, Microchim. Acta 187 (2020).

[20] B. Luo, L. Yu, J. He, Z. Li, F. Lan, Y. Wu, Design of guanidyl-functionalized magnetic covalent organic framework for highly selective capture of endogenous phosphopeptides, J. Chromatogr. B 1145 (2020).

[21] L. Zhang, Z. Xiong, Y. Chen, L. Peng, B. Yu, X. Gao, et al., Soft-template synthesis of hydrophilic metallic zirconia nanoparticle-incorporated ordered mesoporous carbon composite and its application in phosphopeptide enrichment, RSC Adv. 6 (2016) 30014-30020.

[22] L. Li, S. Chen, L. Xu, Y. Bai, Z. Nie, H. Liu, et al., Template-free synthesis of uniform mesoporous SnO2 nanospheres for efficient phosphopeptide enrichment, J. Mater. Chem. B 2 (2014) 1121-1124.

[23] L. Zhang, J. Xu, L. Sun, J. Ma, K. Yang, Z. Liang, et al., Zirconium oxide aerogel for effective enrichment of phosphopeptides with high binding capacity, Anal. Bioanal. Chem. 399 (2011) 3399-3405.

1. * Corresponding authors.

   E-mail addresses: [linann@suse.edu.cn](mailto:linann@suse.edu.cn) (N. Li), [dangfqn@snnu.edu.cn](mailto:dangfqn@snnu.edu.cn) (F.Q. Dang).

   1 These authors contributed equally. [↑](#footnote-ref-1)
